# Supplementary material
Source: ML conference proceedings conference paper supplement (https://openreview.net/forum?id=RJ6eMDcDCv)

Prior Domain  
Knowledge

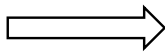

Decision  
Tree Topology

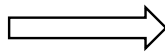

Structure Constrained  
Decision Tree (SCDT)

**Feature Groups:**

- $G_A = \{x_1, \dots, x_{P-1}, x_P\}$
- $G_1 = \{x_1, x_3\}$
- $G_2 = \{x_2, x_4, x_6\}$
- $G_3 = \{x_3, x_5\}$
- $G_4 = \{x_4, x_6, x_7\}$
- $G_5 = \{x_1, x_8\}$
- $\vdots$

**Tree Depth:**

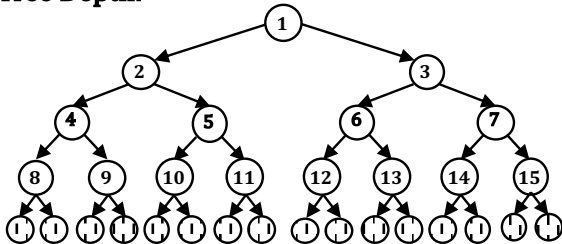

**SCDT:**

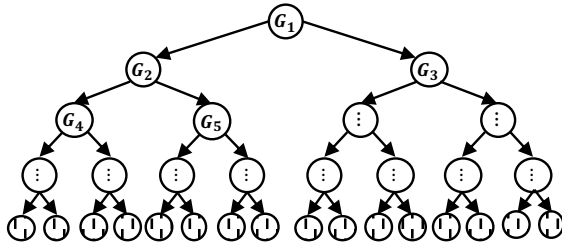

Supplement: supplementary_material [file OPDT_01.pdf › figures/OPDT_01.pdf]
