# Supplementary material
Source: ML conference proceedings conference paper supplement (https://openreview.net/forum?id=RJ6eMDcDCv)
Supplement: supplementary_material [file OPDT_03.pdf › figures/OPDT_03.pdf]

BSCCART

```
IF X[A2] < 34.5
THEN IF X[A5] < 10975.5
THEN 743(188) := Class 0: 188(0.25) Class 1: 555(0.75) VI: 743 - 1880 = -1,137
ELSE 8(0)      := Class 0: 8(1.00)   Class 1: (0.00)   VI: 8 - 0 = 8
ELSE IF X[A13] < 26.5
THEN 31(7)     := Class 0: 24(0.77)  Class 1: 7(0.23)   VI: 31 - 70 = -39
ELSE 118(50)   := Class 0: 50(0.42)  Class 1: 68(0.58)  VI 118 - 500 = -382
```

Optimal Pattern

```
IF X[A2] < 9.00
THEN IF X[A5] < 3384.00
THEN 72(4)     := Class 0: 4(0.06)   Class 1: 68(0.94)   VI: 72 - 40 = 32
ELSE 9(4)      := Class 0: 4(0.44)   Class 1: 5(0.56)   VI: 9 - 40 = -31
ELSE IF X[A5] < 11816.00
THEN 800(248) := Class 0: 248(0.31)  Class 1: 552(0.69) VI: 800 - 2480 = -1,680
ELSE 19(5)     := Class 0: 14(0.74)  Class 1: 5(0.26)   VI: 19 - 50 = -31
```

Optimal Pattern Detection Tree (OPDT)

|                                                                           | Nodes |      | Objective  | IInf | Best Integer | Cuts/      |        | ItCnt | Gap |
|---------------------------------------------------------------------------|-------|------|------------|------|--------------|------------|--------|-------|-----|
|                                                                           | Node  | Left |            |      |              | Best Bound |        |       |     |
| *                                                                         | 0+    | 0    |            |      | 8.0000       | 900.0000   |        |       | --- |
|                                                                           | 0     | 0    | 900.0000   | 34   | 8.0000       | 900.0000   | 17     |       | --- |
|                                                                           | 0     | 0    | 900.0000   | 3    | 8.0000       | Cuts: 6    | 23     |       | --- |
|                                                                           | 0     | 0    | 900.0000   | 542  | 8.0000       | Cuts: 279  | 3976   |       | --- |
|                                                                           | 0     | 0    | 899.0000   | 784  | 8.0000       | Cuts: 635  | 4833   |       | --- |
|                                                                           | 0     | 0    | 899.0000   | 990  | 8.0000       | Cuts: 1185 | 5060   |       | --- |
| Detecting symmetries...                                                   |       |      |            |      |              |            |        |       |     |
|                                                                           | 0     | 2    | 899.0000   | 179  | 8.0000       | 899.0000   | 5060   |       | --- |
| Elapsed time = 2.97 sec. (5624.59 ticks, tree = 0.02 MB, solutions = 1)   |       |      |            |      |              |            |        |       |     |
|                                                                           | 12    | 14   | 899.0000   | 748  | 8.0000       | 899.0000   | 6257   |       | --- |
|                                                                           | 26    | 26   | 899.0000   | 1081 | 8.0000       | 899.0000   | 8039   |       | --- |
|                                                                           | 105   | 81   | 899.0000   | 158  | 8.0000       | 899.0000   | 14584  |       | --- |
|                                                                           | 164   | 120  | 899.0000   | 1191 | 8.0000       | 899.0000   | 22293  |       | --- |
|                                                                           | 200   | 137  | 899.0000   | 115  | 8.0000       | 899.0000   | 34376  |       | --- |
|                                                                           | 241   | 170  | 899.0000   | 74   | 8.0000       | 899.0000   | 40932  |       | --- |
|                                                                           | 268   | 197  | 120.0000   | 564  | 8.0000       | 899.0000   | 51930  |       | --- |
|                                                                           | 295   | 211  | 899.0000   | 28   | 8.0000       | 899.0000   | 58838  |       | --- |
|                                                                           | 337   | 232  | 11.5197    | 60   | 8.0000       | 899.0000   | 61766  |       | --- |
|                                                                           | 389   | 271  | infeasible |      | 8.0000       | 899.0000   | 110911 |       | --- |
| Elapsed time = 4.99 sec. (8751.74 ticks, tree = 0.96 MB, solutions = 1)   |       |      |            |      |              |            |        |       |     |
|                                                                           | 409   | 266  | 899.0000   | 571  | 8.0000       | 899.0000   | 125240 |       | --- |
|                                                                           | 425   | 268  | 899.0000   | 846  | 8.0000       | 899.0000   | 142524 |       | --- |
|                                                                           | 766   | 412  | 899.0000   | 880  | 8.0000       | 899.0000   | 173535 |       | --- |
| *                                                                         | 913+  | 378  |            |      | 9.0000       | 899.0000   |        |       | --- |
|                                                                           | 1186  | 448  | 244.3839   | 426  | 9.0000       | 899.0000   | 184793 |       | --- |
|                                                                           | 1679  | 663  | 175.8439   | 814  | 9.0000       | 899.0000   | 229554 |       | --- |
|                                                                           | 2083  | 770  | 899.0000   | 115  | 9.0000       | 899.0000   | 265576 |       | --- |
| *                                                                         | 2087+ | 304  |            |      | 19.0000      | 899.0000   |        |       | --- |
|                                                                           | 2163  | 779  | 32.4802    | 655  | 19.0000      | 899.0000   | 295159 |       | --- |
|                                                                           | 2433  | 776  | 144.5734   | 516  | 19.0000      | 899.0000   | 309651 |       | --- |
| *                                                                         | 2784+ | 881  |            |      | 32.0000      | 899.0000   |        |       | --- |
|                                                                           | 2794  | 852  | 464.8061   | 994  | 32.0000      | 899.0000   | 383976 |       | --- |
|                                                                           | 3252  | 943  | 401.5965   | 956  | 32.0000      | 899.0000   | 415834 |       | --- |
| Elapsed time = 12.67 sec. (18396.60 ticks, tree = 3.36 MB, solutions = 5) |       |      |            |      |              |            |        |       |     |
|                                                                           | 3564  | 978  | 899.0000   | 1370 | 32.0000      | 899.0000   | 427728 |       | --- |
|                                                                           | 3691  | 974  | 49.0437    | 185  | 32.0000      | 899.0000   | 454519 |       | --- |
|                                                                           | 3977  | 1037 | 81.2183    | 643  | 32.0000      | 899.0000   | 475631 |       | --- |
|                                                                           | 4199  | 1054 | 419.5000   | 754  | 32.0000      | 899.0000   | 505513 |       | --- |
