# Supplementary material
Source: ML conference proceedings conference paper supplement (https://openreview.net/forum?id=RJ6eMDcDCv)

## Feature Groups:

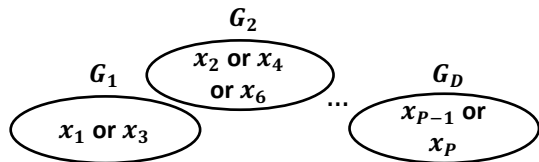

## Structure Constraints:

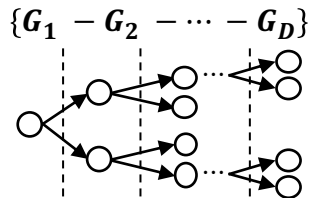

## OPDT:

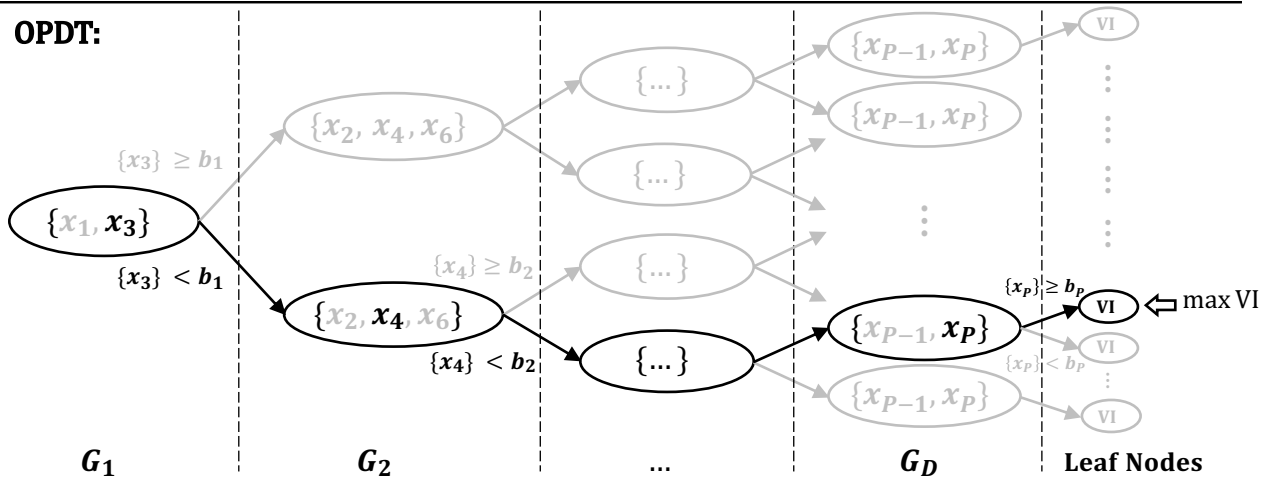

Supplement: supplementary_material [file OPDT_02.pdf › figures/OPDT_02.pdf]

Numerical Features: 'A2', 'A5', 'A8', 'A11', 'A13', 'A16', 'A18'

Categorical Features: 'A1', 'A3', 'A4', 'A6', 'A7', 'A9', 'A10', 'A12', 'A14', 'A15', 'A17', 'A19', 'A20'

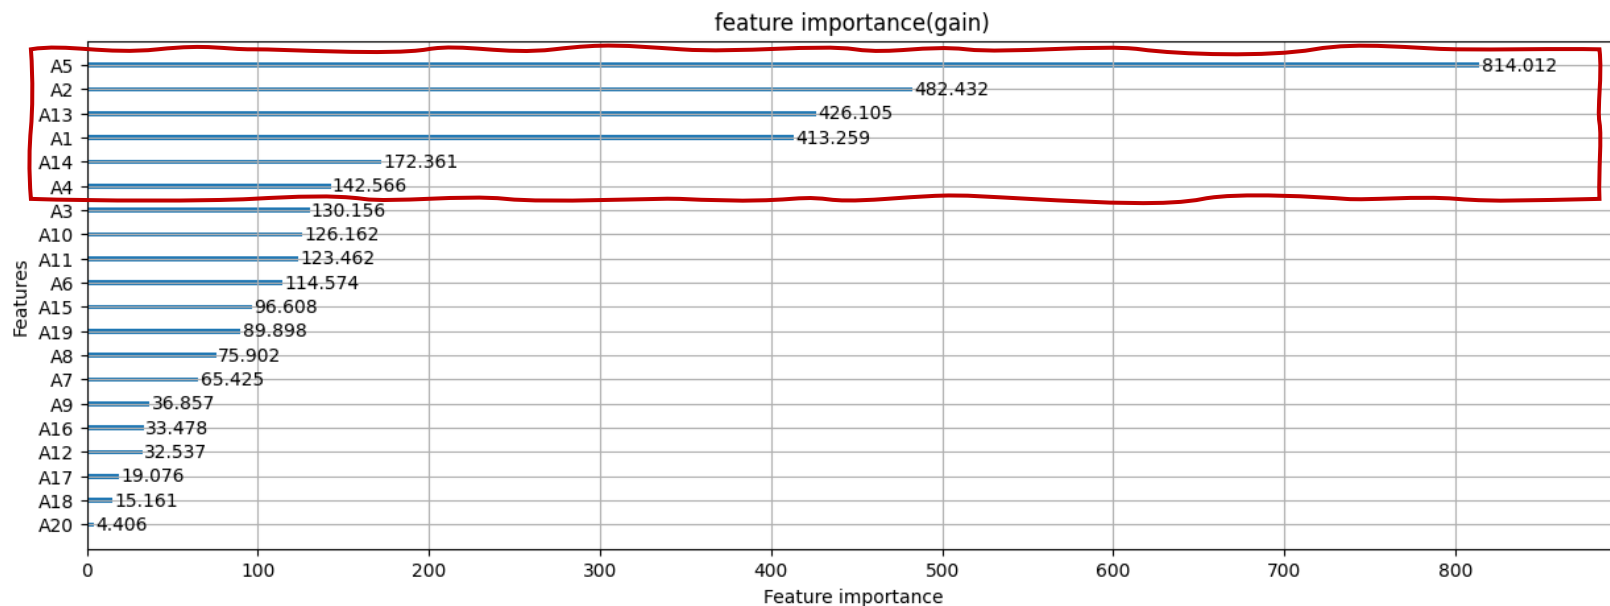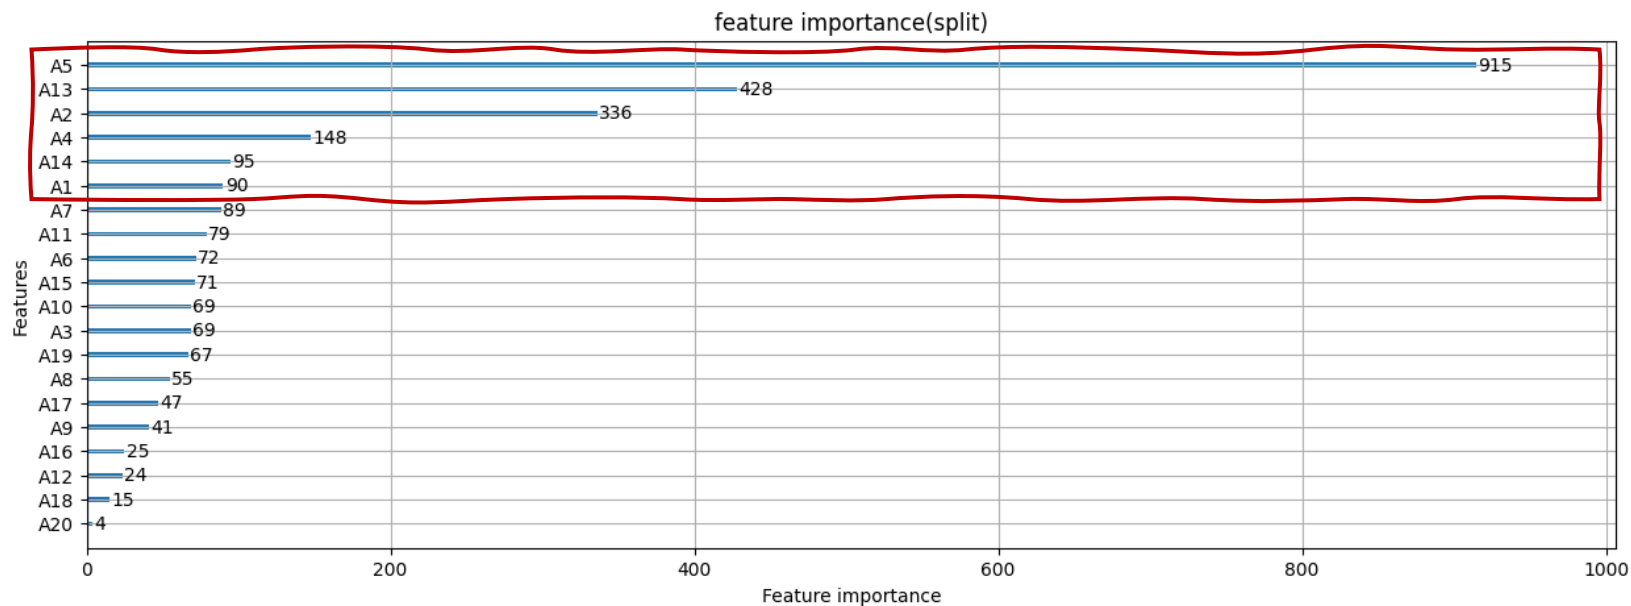

Supplement: supplementary_material [file OPDT_04.pdf › figures/OPDT_04.pdf]
